# Supplementary material
Source: Research Square preprint supplement (doi:10.21203/rs.3.rs-9404747/v1)
Supplement: Supplementary file 1 [file 10db2522605f5aa7935cbb57.pdf]

**Household Hygiene Behaviors, Perceived Responsibility for Vector Control, and Vulnerability to Rat and Mosquito Sightings in Disadvantaged Urban Communities**

Bárbara Inês Arcanjo Xavier<sup>1\*</sup>, Diogo César de Carvalho Santiago<sup>2</sup>, Hernán Darío Argibay<sup>1</sup>, Maria Eduarda Oliveira Dias<sup>3</sup>, Adrielly da Costa Dantas<sup>4</sup>, Railander Henrique Deiró Souza<sup>4</sup>, Indiara dos Santos Silva<sup>5</sup>, Victor Coutinho Santos<sup>5,6</sup>, George Gonçalves Machado<sup>1,7</sup>, Juliet Oliveira Santana<sup>5,7</sup>, Fabiana Almerinda G. Palma<sup>1</sup>, Nivison Nery Jr<sup>5</sup>, Fábio Neves Souza<sup>1</sup>, Max T. Eyre<sup>8</sup>, Cleber Cremonese<sup>1</sup>, Federico Costa<sup>1,5,9</sup> & Adedayo Michael Awoniyi<sup>1\*</sup>

**Supplementary Material IIIa:** Results of descriptive and univariable ordinal logistic regression assessing associations between rat sighting frequency and key individual explanatory variables.

| Characteristic                            | Frequency of rat sighting |                  |               |              | Fisher's Exact Test | Univariable statistics |              |
|-------------------------------------------|---------------------------|------------------|---------------|--------------|---------------------|------------------------|--------------|
|                                           | Daily (n=59)              | Sometimes (n=29) | Rarely (n=27) | Never (n=21) |                     |                        |              |
| <b>Study community</b>                    |                           |                  |               |              | <b>0.021</b>        |                        |              |
| Nova Sussuarana                           | 11 (18.6%)                | 11 (37.9%)       | 8 (29.6%)     | 3 (14.3%)    |                     | Ref                    |              |
| Arenoso                                   | 14 (23.7%)                | 4 (13.8%)        | 10 (37.0%)    | 4 (19.0%)    |                     | 0.97 (0.41, 2.31)      | >0.9         |
| J. Santo Inácio                           | 12 (20.3%)                | 8 (27.6%)        | 8 (29.6%)     | 6 (28.6%)    |                     | 1.19 (0.51, 2.75)      | 0.7          |
| Calabetão                                 | 22 (37.3%)                | 6 (20.7%)        | 1 (3.7%)      | 8 (38.1%)    |                     | 0.54 (0.22, 1.30)      | 0.2          |
| <b>Household altitude</b>                 | 43.1 (8.3)                | 44.8 (7.6)       | 42.2 (9.6)    | 44.8 (8.0)   | 0.659               | 1.01 (0.97, 1.05)      | 0.7          |
| <b>Land surface temperature</b>           | 31.6 (0.8)                | 31.8 (0.5)       | 32.1 (0.7)    | 32.0 (0.9)   | <b>0.003</b>        | 1.93 (1.23, 3.08)      | <b>0.005</b> |
| <b>Age of HoH</b>                         | 47.3 (15.7)               | 52.3 (15.7)      | 53.9 (11.7)   | 56.6 (16.3)  | <b>0.003</b>        | 1.03 (1.01, 1.05)      | <b>0.006</b> |
| <b>Sex of HoH</b>                         |                           |                  |               |              | 0.187               |                        |              |
| Female                                    | 42 (71.2%)                | 14 (48.3%)       | 17 (63.0%)    | 15 (71.4%)   |                     | Ref                    |              |
| Male                                      | 17 (28.8%)                | 15 (51.7%)       | 10 (37.0%)    | 6 (28.6%)    |                     | 1.18 (0.63, 2.22)      | 0.6          |
| <b>*Highest level of education of HoH</b> |                           |                  |               |              | 0.899               |                        |              |
| Never studied                             | 5 (8.6%)                  | 1 (3.4%)         | 1 (3.7%)      | 2 (9.5%)     |                     | Ref                    |              |
| Primary education                         | 16 (27.6%)                | 11 (37.9%)       | 9 (33.3%)     | 8 (38.1%)    |                     | 1.61 (0.40, 7.13)      | 0.5          |
| Secondary education                       | 32 (55.2%)                | 14 (48.3%)       | 15 (55.6%)    | 11 (52.4%)   |                     | 1.27 (0.33, 5.45)      | 0.7          |
| Bachelor degree                           | 5 (8.6%)                  | 3 (10.3%)        | 2 (7.4%)      | 0 (0.0%)     |                     | 0.78 (0.14, 4.52)      | 0.8          |
| <b>*Occupation of HoH</b>                 |                           |                  |               |              | 0.776               |                        |              |
| Formal worker                             | 12 (21.6%)                | 6 (20.7%)        | 6 (23.1%)     | 7 (35.0%)    |                     | Ref                    |              |

|                                                               |            |            |            |            |                   |              |
|---------------------------------------------------------------|------------|------------|------------|------------|-------------------|--------------|
| Informal worker                                               | 18 (32.1%) | 7 (24.1%)  | 5 (19.2%)  | 3 (15.0%)  | 0.46 (0.18, 1.15) | 0.16         |
| Retired                                                       | 10 (17.9%) | 7 (24.1%)  | 8 (30.8%)  | 6 (30.0%)  | 1.13 (0.46, 2.81) | 0.8          |
| Unemployed                                                    | 16 (26.6%) | 9 (31.0%)  | 7 (26.9%)  | 4 (20.0%)  | 0.65 (0.27, 1.57) | 0.3          |
| <b>*Household per capita<br/>monthly income</b>               |            |            |            |            | 0.234             |              |
| Less than 249 USD                                             | 50 (87.7%) | 24 (82.8%) | 20 (76.9%) | 13 (68.4%) | Ref               |              |
| More than 249 USD                                             | 7 (12.3%)  | 5 (17.2%)  | 6 (23.1%)  | 6 (31.6%)  | 2.24 (1.00, 5.07) | <b>0.051</b> |
| <b>Backyard used for gardening</b>                            |            |            |            |            | 0.288             |              |
| No                                                            | 33 (55.9%) | 17 (58.6%) | 10 (37.0%) | 9 (42.9%)  | Ref               |              |
| Yes                                                           | 26 (44.1%) | 12 (41.4%) | 17 (63.0%) | 12 (57.1%) | 1.61 (0.87, 2.99) | 0.13         |
| <b>Means of waste storage<br/>before final disposal</b>       |            |            |            |            | 0.837             |              |
| Open bin                                                      | 12 (20.3%) | 7 (24.1%)  | 7 (25.9%)  | 7 (33.3%)  | Ref               |              |
| Closed bin                                                    | 15 (25.4%) | 7 (24.1%)  | 8 (29.6%)  | 6 (28.6%)  | 0.80 (0.34, 1.91) | 0.6          |
| Open sack bag                                                 | 13 (22.0%) | 6 (20.7%)  | 3 (11.1%)  | 1 (4.8%)   | 0.37 (0.13, 1.00) | <b>0.053</b> |
| Closed sack bag                                               | 19 (32.2%) | 9 (31.0%)  | 9 (33.3%)  | 7 (33.3%)  | 0.74 (0.32, 1.70) | 0.5          |
| <b>*HH waste disposal practices</b>                           |            |            |            |            | 0.164             |              |
| Municipal pickup                                              | 22 (37.3%) | 14 (48.3%) | 18 (66.7%) | 11 (55.0%) | Ref               |              |
| Community central bin                                         | 24 (40.7%) | 13 (44.8%) | 6 (22.2%)  | 7 (35.0%)  | 0.55 (0.28, 1.08) | 0.083        |
| Others                                                        | 13 (22.0%) | 2 (6.9%)   | 3 (11.1%)  | 2 (10.0%)  | 0.32 (0.11, 0.85) | <b>0.028</b> |
| <b>*Waste type most difficult to<br/>manage</b>               |            |            |            |            | 0.101             |              |
| Solid                                                         | 16 (32.0%) | 8 (30.8%)  | 10 (37.0%) | 7 (43.8%)  | Ref               |              |
| Glass                                                         | 4 (8.0%)   | 7 (26.9%)  | 7 (25.9%)  | 4 (25.0%)  | 1.65 (0.66, 4.16) | 0.3          |
| Electronic                                                    | 10 (20.0%) | 5 (19.2%)  | 1 (3.7%)   | 0 (0.0%)   | 0.29 (0.09, 0.85) | <b>0.029</b> |
| Others                                                        | 20 (40.0%) | 6 (23.1%)  | 9 (33.3%)  | 5 (31.3%)  | 0.66 (0.29, 1.50) | 0.3          |
| <b>Perceived rat sightings as<br/>normal</b>                  |            |            |            |            | 0.107             |              |
| No                                                            | 49 (83.1%) | 26 (89.7%) | 27(100.0%) | 19 (90.5%) | Ref               |              |
| Yes                                                           | 10 (16.9%) | 3 (10.3%)  | 0 (0.0%)   | 2 (9.5%)   | 0.34 (0.10, 1.00) | 0.060        |
| <b>Perceived helplessness<br/>toward rat sightings</b>        |            |            |            |            | 0.507             |              |
| No                                                            | 49 (83.1%) | 25 (86.2%) | 25 (92.6%) | 20 (95.2%) | Ref               |              |
| Yes                                                           | 10 (16.9%) | 4 (13.8%)  | 2 (7.4%)   | 1 (4.8%)   | 0.44 (0.16, 1.15) | 0.10         |
| <b>*Prior participation in<br/>hygiene awareness programs</b> |            |            |            |            | 0.296             |              |
| No                                                            | 31 (52.5%) | 16 (55.2%) | 17 (65.4%) | 15 (75.0%) | Ref               |              |
| Yes                                                           | 28 (47.5%) | 13 (44.8%) | 9 (34.6%)  | 5 (25.0%)  | 0.56 (0.29, 1.05) | 0.074        |
| <b>Backyard hygiene conditions</b>                            |            |            |            |            | 0.531             |              |

|  |                                                          |             |             |            |            |              |                   |              |
|--|----------------------------------------------------------|-------------|-------------|------------|------------|--------------|-------------------|--------------|
|  | Clean                                                    | 23 (39.0%)  | 16 (55.2%)  | 12 (44.4%) | 10 (47.6%) |              | Ref               |              |
|  | Unclean                                                  | 36 (61.0%)  | 13 (44.8%)  | 15 (55.6%) | 11 (52.4%) | <b>0.019</b> | 0.77 (0.41, 1.43) | 0.4          |
|  | <b>*Concern about backyard status</b>                    |             |             |            |            |              |                   |              |
|  | Always                                                   | 49 (83.1%)  | 22 (75.9%)  | 26 (96.3%) | 13 (61.9%) |              | Ref               |              |
|  | Sometimes                                                | 10 (16.9%)  | 7 (24.1%)   | 1 (3.7%)   | 8 (38.1%)  | 0.457        | 1.44 (0.64, 3.22) | 0.4          |
|  | <b>Rodenticide use for rat control</b>                   |             |             |            |            |              |                   |              |
|  | No                                                       | 29 (49.2%)  | 16 (55.2%)  | 18 (66.7%) | 13 (61.9%) |              | Ref               |              |
|  | Yes                                                      | 30 (50.8%)  | 13 (44.8%)  | 9 (33.3%)  | 8 (38.1%)  | 0.125        | 0.62 (0.33, 1.16) | 0.13         |
|  | <b>Perceived body responsible for rat control</b>        |             |             |            |            |              |                   |              |
|  | Individual household                                     | 7 (11.9%)   | 10 (34.5%)  | 7 (25.9%)  | 8 (38.1%)  |              | Ref               |              |
|  | The community                                            | 26 (44.1%)  | 9 (31.0%)   | 8 (29.6%)  | 5 (23.8%)  |              | 0.33 (0.14, 0.73) | <b>0.008</b> |
|  | The government                                           | 26 (44.1%)  | 10 (34.5%)  | 12 (44.4%) | 8 (38.1%)  |              | 0.47 (0.21, 1.01) | 0.055        |
|  | <b>*Solid waste present in the backyard</b>              |             |             |            |            | 0.685        |                   |              |
|  | No                                                       | 12 (21.1%)  | 3 (11.5%)   | 6 (22.2%)  | 5 (23.8%)  |              | Ref               |              |
|  | Yes                                                      | 45 (78.9%)  | 23 (88.5%)  | 21 (77.8%) | 16 (76.2%) |              | 0.92 (0.42, 2.09) | 0.8          |
|  | <b>Health awareness barriers to backyard cleanliness</b> |             |             |            |            |              |                   |              |
|  | No                                                       | 59 (100.0%) | 29 (100.0%) | 26 (96.3%) | 20 (95.2%) | 0.3          | Ref               |              |
|  | Yes                                                      | 0 (0.0%)    | 0 (0.0%)    | 1 (3.7%)   | 1 (4.8%)   |              | 8.46 (0.73, 39.0) | 0.094        |
|  | <b>Lack of time as a barrier to backyard cleanliness</b> |             |             |            |            |              |                   |              |
|  | No                                                       | 53 (89.8%)  | 25 (86.2%)  | 24 (88.9%) | 19 (90.5%) | 0.3          | Ref               |              |
|  | Yes                                                      | 6 (10.2%)   | 4 (13.8%)   | 3 (11.1%)  | 2 (9.5%)   |              | 1.02 (0.38, 2.66) | >0.9         |

11 <sup>1</sup>n (%); Mean (SD)

12 <sup>2</sup>Kruskal-Wallis rank sum test

13 Abbreviations: CI = Confidence Interval, OR = Odds Ratio, HH=Household, HoH=Head of Household

14 \*Variables containing missing data

15

16

17

18

19

20

21

22 **Supplementary Material IIIb: Final Model Selection - Rat sightings**

|                           | Poison for rat control | Rat sightings seen as normal | Neighborhood | Age of HoH (continuous) | Prior participation in hygiene awareness programs | Waste type most difficult to manage | Perceived body responsible for rat control | Backyard used for gardening | AICc  |
|---------------------------|------------------------|------------------------------|--------------|-------------------------|---------------------------------------------------|-------------------------------------|--------------------------------------------|-----------------------------|-------|
| Model 1                   |                        |                              | +            | +                       | +                                                 | +                                   | +                                          | +                           | 295.4 |
| Model 2                   | +                      |                              | +            | +                       | +                                                 | +                                   | +                                          | +                           | 295.6 |
| <b>Model 3 (selected)</b> |                        |                              | +            | +                       | +                                                 | +                                   | +                                          |                             | 295.6 |
| Model 4                   |                        | +                            | +            | +                       | +                                                 | +                                   | +                                          | +                           | 295.8 |
| Model 5                   | +                      |                              | +            | +                       | +                                                 | +                                   | +                                          |                             | 296   |

23 HoH - Head of Household; HH - Household

24
