# Supplementary material
Source: Research Square preprint supplement (doi:10.21203/rs.3.rs-9404747/v1)
Supplement: Supplementary file 2 [file 95b8b8877ba25d030adfe473.pdf]

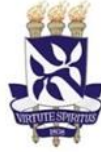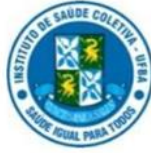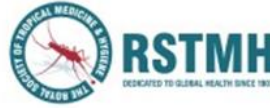

1

2 **Household Hygiene Behaviors, Perceived Responsibility for Vector Control, and Vulnerability to**  
3 **Rat and Mosquito Sightings in Disadvantaged Urban Communities**

4 Bárbara Inês Arcanjo Xavier<sup>1\*</sup>, Diogo César de Carvalho Santiago<sup>2</sup>, Hernán Darío Argibay<sup>1</sup>, Maria  
5 Eduarda Oliveira Dias<sup>3</sup>, Adrielly da Costa Dantas<sup>4</sup>, Railander Henrique Deiró Souza<sup>4</sup>, Indiará dos Santos  
6 Silva<sup>5</sup>, Victor Coutinho Santos<sup>5,6</sup>, George Gonçalves Machado<sup>1,7</sup>, Juliet Oliveira Santana<sup>5,7</sup>, Fabiana  
7 Almerinda G. Palma<sup>1</sup>, Nivison Nery Jr<sup>5</sup>, Fábio Neves Souza<sup>1</sup>, Max T. Eyre<sup>8</sup>, Cleber Cremonese<sup>1</sup>,  
8 Federico Costa<sup>1,5,9</sup> & Adedayo Michael Awoniyi<sup>1\*</sup>

9

10 **Supplementary Material I: Sample of the survey questionnaire**

| <b>A. General demographics information</b>                                                                               |                                                                                                                                                                         |
|--------------------------------------------------------------------------------------------------------------------------|-------------------------------------------------------------------------------------------------------------------------------------------------------------------------|
| 1. Neighborhood                                                                                                          | i. Nova Sussuarana; ii. Arenoso;<br>iii. St. Ignatius Garden; iv. Calabetão                                                                                             |
| 2. Interviewer(s) Initials                                                                                               |                                                                                                                                                                         |
| 3. Date of collect                                                                                                       |                                                                                                                                                                         |
| 4. Family/participant situation                                                                                          | i. Already participated in at least one of the previous study campaign;<br>ii. Recently moved to the neighborhood and have never participated in any previous campaign. |
| 5. Do you agree to participate and respond to answer the following single-study survey questions - <b>open if Q4 = i</b> | i. Yes;<br>ii. No;<br>iii. Not found;<br>iv. Access no possible                                                                                                         |
| 6. How long have you lived in the community?                                                                             | i. Less than 6 months; ii. 6-12 months;<br>iii. 1-2 years; iv. 1-2 years;<br>v. More than 3 years                                                                       |
| 7. Number of people currently living in the household.                                                                   | <i>to be provided by the interviewee</i>                                                                                                                                |
| 8. Gender of the head of household                                                                                       | i. Male; ii. Female; iii. Other                                                                                                                                         |
| 9. Marital status of the head of the family                                                                              | i. Married; ii. Single;<br>iii. Separated; iv. Widowed ;<br>Other                                                                                                       |
| 10. Age of the head of the family                                                                                        | <i>to be provided by the interviewee</i>                                                                                                                                |
| 11. Current occupation of the head of the family                                                                         | i. Formal worker;<br>ii. Informal worker;<br>iii. Retired ;<br>iv. Unemployed                                                                                           |

|                                                                                                      |                                                                                                                                                                                                                       |
|------------------------------------------------------------------------------------------------------|-----------------------------------------------------------------------------------------------------------------------------------------------------------------------------------------------------------------------|
| 12. Highest level of education of the head of the family                                             | i. Literacy; ii. Secondary education<br>iii. Fundamental I iv. Fundamental II<br>v. Incomplete higher education vi. Completed higher education<br>vii. Master's degree; viii. Don't know/no answer<br>ix. Never found |
| 13. Current average monthly income of the head of household.                                         | <i>to be provided by the interviewee</i>                                                                                                                                                                              |
| 14. Current average monthly income of the entire family.                                             | <i>to be provided by the interviewee</i>                                                                                                                                                                              |
| <b>B. General residents' waste disposal practices and backyard use</b>                               |                                                                                                                                                                                                                       |
| 15. Presence of solid waste in the backyard?<br><b>(interviewer must inspect)</b>                    | i. No;<br>ii. Yes                                                                                                                                                                                                     |
| 16. What is the main use of your backyard?<br><b>(interviewer must inspect)</b>                      | i. Gardening;<br>ii. Storage of items, i.e., tools, old furniture, etc.;<br>iii. Disposal of household waste;<br>iv. Recreational purposes;<br>v. Other                                                               |
| 17. Waste storage prior to final disposal <b>(interviewer must inspect)</b>                          | i. Open trash can;<br>ii. Covered trash can;<br>iii. Open sack bag;<br>iv. Closed sack bag                                                                                                                            |
| 18. What method is used for the final disposal of waste?                                             | i. Municipal pickup;<br>ii. Deposited in the community's central waste container;<br>iii. Others                                                                                                                      |
| 19. What types of waste are most challenging to manage in your backyard?                             | i. Solid waste;<br>ii. Glass;<br>iii. Electronics and batteries;<br>iv. Others                                                                                                                                        |
| 20. Does your community have a central waste container? How far is it from your home?                | i. Yes, it's less than 30 m away;<br>ii. Yes, but a little further away, between 30-40 m;<br>iii. Yes, but very far away - more than 40 m;<br>iv. No, we don't have any.                                              |
| <b>C. Assessment of rat and mosquito proliferation and residents' perception post-pest sightings</b> |                                                                                                                                                                                                                       |
| 21. In the last year, how often have you seen rats in or around your house?                          | i. Daily;<br>ii. Sometimes (a few times a week-i.e. $\geq 3X$ );<br>iii. Rarely (I see it a few times a month);<br>iv. Never                                                                                          |
| 22. In the last year, how often have you seen mosquitoes in or around your home?                     | i. Daily;<br>ii. Sometimes (a few times a week-i.e. $\geq 3X$ );<br>iii. Rarely (I see it a few times a month);<br>iv. Never                                                                                          |
| 23. How do you feel when you see rats in your surroundings?                                          | i. It's nothing;<br>ii. A normal part of life;<br>iii. Fear/Anxiety;<br>iv. Anger;                                                                                                                                    |

|                                                                                                                          |                                                                                                                                                                                                       |
|--------------------------------------------------------------------------------------------------------------------------|-------------------------------------------------------------------------------------------------------------------------------------------------------------------------------------------------------|
|                                                                                                                          | v. Helplessness;<br>vi. Neutral/no opinion                                                                                                                                                            |
| 24. How do you feel when you see mosquitoes around you?                                                                  | i. It's nothing;<br>ii. A normal part of life;<br>iii. Fear/Anxiety;<br>iv. Anger;<br>v. Helplessness;<br>vi. Neutral/no opinion                                                                      |
| 25. Have you participated in or heard of any community awareness programs that promote hygiene and household sanitation? | i. No;<br>ii. Yes                                                                                                                                                                                     |
| <b>D. Residents' backyards hygiene condition and pest prevention.</b>                                                    |                                                                                                                                                                                                       |
| 26. How would you rate the condition of the backyard?                                                                    | i. Clean;<br>ii. Unclean                                                                                                                                                                              |
| 27. Are you concerned about the state of your backyard?                                                                  | i. Always;<br>ii. Sometimes                                                                                                                                                                           |
| 28. Lack of time as a factor preventing you from keeping your backyard clean?                                            | i. No;<br>ii. Yes                                                                                                                                                                                     |
| 29. Lack of health awareness program as a barrier preventing you from keeping your backyard clean?                       | i. No;<br>ii. Yes                                                                                                                                                                                     |
| 30. What actions did you take to control rats?                                                                           | i. Capture;<br>ii. Rat poison;<br>iii. Habitat modification, i.e., sealing holes or cracks in the house;<br>iv. improved sanitation, i.e., removal of food and water sources;                         |
| 31. What actions did you take to control mosquitoes?                                                                     | i. Use of mosquito nets;<br>ii. Use of mosquito repellents;<br>iii. Habitat modification, i.e., installation of nets on windows;<br>iv. improved sanitation, i.e., removal of cans and stagnant water |
| <b>E. Perceptions about responsibility of pest control.</b>                                                              |                                                                                                                                                                                                       |
| 32. Who do you think is responsible for controlling rats and mosquitoes in your community?                               | i. Individual, that is, each household;<br>ii. The community;<br>iii. The governor                                                                                                                    |
