# Supplementary material
Source: Research Square preprint supplement (doi:10.21203/rs.3.rs-9404747/v1)
Supplement: Supplementary file 3 [file 9967d6e7a1147bb99d909e39.pdf]

1 **Household Hygiene Behaviors, Perceived Responsibility for Vector Control, and Vulnerability to**  
 2 **Rat and Mosquito Sightings in Disadvantaged Urban Communities**

3 Bárbara Inês Arcanjo Xavier<sup>1\*</sup>, Diogo César de Carvalho Santiago<sup>2</sup>, Hernán Darío Argibay<sup>1</sup>, Maria  
 4 Eduarda Oliveira Dias<sup>3</sup>, Adrielly da Costa Dantas<sup>4</sup>, Railander Henrique Deiró Souza<sup>4</sup>, Indiara dos Santos  
 5 Silva<sup>5</sup>, Victor Coutinho Santos<sup>5,6</sup>, George Gonçalves Machado<sup>1,7</sup>, Juliet Oliveira Santana<sup>5,7</sup>, Fabiana  
 6 Almerinda G. Palma<sup>1</sup>, Nivison Nery Jr<sup>5</sup>, Fábio Neves Souza<sup>1</sup>, Max T. Eyre<sup>8</sup>, Cleber Cremonese<sup>1</sup>,  
 7 Federico Costa<sup>1,5,9</sup> & Adedayo Michael Awoniyi<sup>1\*</sup>

8

9 **Supplementary Material IIa: Summary of Variance Inflation Factor (VIF) Analysis for rat sightings**

| Predictor                                         | GVIF  | Degrees of Freedom | Adjusted GVIF |
|---------------------------------------------------|-------|--------------------|---------------|
| Study community                                   | 2.798 | 3                  | 1.187         |
| Land surface temperature                          | 1.308 | 1                  | 1.144         |
| Age of HoH                                        | 1.391 | 1                  | 1.179         |
| Monthly household per capita income               | 1.303 | 1                  | 1.142         |
| Backyard used for gardening                       | 1.119 | 1                  | 1.058         |
| Means of waste storage before final disposal      | 1.625 | 3                  | 1.084         |
| HH waste disposal practices                       | 1.791 | 2                  | 1.157         |
| Waste type most difficult to manage               | 2.539 | 3                  | 1.168         |
| Rat sightings seen as normal                      | 1.156 | 1                  | 1.075         |
| Perceived helplessness toward rat sightings       | 1.222 | 1                  | 1.105         |
| Prior participation in hygiene awareness programs | 1.279 | 1                  | 1.131         |
| Health awareness barriers to backyard cleanliness | 1.347 | 1                  | 1.161         |
| Poison for rat control                            | 1.238 | 1                  | 1.113         |
| Perceived body responsible for rat control        | 1.69  | 2                  | 1.14          |

10  
 11  
 12  
 13  
 14  
 15  
 16  
 17  
 18  
 19

20 **Supplementary Material IIb: Summary of Variance Inflation Factor (VIF) Analysis for mosquito sightings**

| <b>Predictor</b>                                  | <b>GVIF</b> | <b>Degrees of Freedom</b> | <b>Adjusted GVIF</b> |
|---------------------------------------------------|-------------|---------------------------|----------------------|
| Study community                                   | 10.583      | 3                         | 1.482                |
| Household elevation gradient                      | 7.499       | 1                         | 2.738                |
| Land surface temperature                          | 1.3         | 1                         | 1.14                 |
| Age of HoH                                        | 1.226       | 1                         | 1.107                |
| Monthly household per capita income               | 1.183       | 1                         | 1.088                |
| Solid waste present in the backyard               | 1.135       | 1                         | 1.065                |
| Backyard used for gardening                       | 1.116       | 1                         | 1.056                |
| HH waste disposal practices                       | 1.58        | 2                         | 1.121                |
| Helpless after mosquito sighting                  | 1.118       | 1                         | 1.057                |
| Backyard hygiene conditions                       | 1.164       | 1                         | 1.079                |
| Lack of time as a barrier to backyard cleanliness | 1.226       | 1                         | 1.107                |
| Net installation for mosquito control             | 1.344       | 1                         | 1.159                |
| Stagnant water removal for mosquito control       | 1.184       | 1                         | 1.088                |

21
