# Supplementary material
Source: Research Square preprint supplement (doi:10.21203/rs.3.rs-9404747/v1)
Supplement: Supplementary file 4 [file dc66f5f68727951313fdbc21.pdf]

1 **Household Hygiene Behaviors, Perceived Responsibility for Vector Control, and Vulnerability to Rat and Mosquito Sightings in Disadvantaged**  
2 **Urban Communities**

3 Bárbara Inês Arcanjo Xavier<sup>1\*</sup>, Diogo César de Carvalho Santiago<sup>2</sup>, Hernán Darío Argibay<sup>1</sup>, Maria Eduarda Oliveira Dias<sup>3</sup>, Adrielly da Costa Dantas<sup>4</sup>,  
4 Railander Henrique Deiró Souza<sup>4</sup>, Indiara dos Santos Silva<sup>5</sup>, Victor Coutinho Santos<sup>5,6</sup>, George Gonçalves Machado<sup>1,7</sup>, Juliet Oliveira Santana<sup>5,7</sup>,  
5 Fabiana Almerinda G. Palma<sup>1</sup>, Nivison Nery Jr<sup>5</sup>, Fábio Neves Souza<sup>1</sup>, Max T. Eyre<sup>8</sup>, Cleber Cremonese<sup>1</sup>, Federico Costa<sup>1,5,9</sup> & Adedayo Michael  
6 Awoniyi<sup>1\*</sup>

7  
8  
9  
10  
11

**Supplementary Material IVa:** Results of descriptive and univariable ordinal logistic regression assessing associations between mosquito sighting frequency and individual explanatory variables.

| Characteristic                            | Frequency of mosquito sighting |                  |               |             | Fisher's Exact Test | Univariable statistics |              |
|-------------------------------------------|--------------------------------|------------------|---------------|-------------|---------------------|------------------------|--------------|
|                                           | Daily (n=91)                   | Sometimes (n=22) | Rarely (n=15) | Never (n=8) |                     |                        |              |
| <b>Study community</b>                    |                                |                  |               |             | 0.084               |                        |              |
| Nova Sussuarana                           | 24 (26.4%)                     | 5 (22.7%)        | 4 (26.7%)     | 0 (0.0%)    |                     | Ref                    |              |
| Arenoso                                   | 25 (27.5%)                     | 3 (13.6%)        | 4 (26.7%)     | 0 (0.0%)    |                     | 0.78 (0.25, 2.39)      | 0.7          |
| J. Santo Inácio                           | 16 (17.6%)                     | 8 (36.4%)        | 5 (33.3%)     | 5 (62.5%)   |                     | 3.15 (1.20, 8.71)      | <b>0.022</b> |
| Calabetão                                 | 26 (28.6%)                     | 6 (27.3%)        | 2 (13.3%)     | 3 (37.5%)   |                     | 1.18 (0.43, 3.36)      | 0.7          |
| <b>Household altitude</b>                 | 42.2 (8.1)                     | 46.2 (8.0)       | 44.0 (9.5)    | 50.8 (4.4)  | <b>0.010</b>        | 1.06 (1.02, 1.11)      | <b>0.007</b> |
| <b>Land surface temperature</b>           | 31.7 (0.7)                     | 32.1 (0.7)       | 31.9 (0.7)    | 32.4 (0.6)  | <b>0.007</b>        | 2.09 (1.28, 3.57)      | <b>0.005</b> |
| <b>Age of HoH</b>                         | 49.0 (14.8)                    | 53.9 (17.1)      | 58.4 (14.0)   | 53.3 (16.3) | <b>0.010</b>        | 1.03 (1.00, 1.05)      | <b>0.027</b> |
| <b>Sex of HoH</b>                         |                                |                  |               |             | 0.280               |                        |              |
| Female                                    | 55 (60.4%)                     | 17 (77.3%)       | 9 (60.0%)     | 7 (87.5%)   |                     | Ref                    |              |
| Male                                      | 36 (39.6%)                     | 5 (22.7%)        | 6 (40.0%)     | 1 (12.5%)   |                     | 0.57 (0.26, 1.21)      | 0.2          |
| <b>*Highest level of education of HoH</b> |                                |                  |               |             | 0.521               |                        |              |
| Never studied                             | 6 (6.6%)                       | 1 (4.8%)         | 0 (0.0%)      | 2 (25.0%)   |                     | Ref                    |              |
| Primary education                         | 32 (35.2%)                     | 5 (23.8%)        | 5 (33.3%)     | 2 (25.0%)   |                     | 0.63 (0.14, 3.40)      | 0.6          |
| Secondary education                       | 44 (48.4%)                     | 14 (66.7%)       | 10 (66.7%)    | 4 (50.0%)   |                     | 1.01 (0.24, 5.13)      | >0.9         |
| Bachelor degree                           | 9 (9.9%)                       | 1 (4.8%)         | 0 (0.0%)      | 0 (0.0%)    |                     | 0.17 (0.01, 1.74)      | 0.2          |
| <b>*Occupation of HoH</b>                 |                                |                  |               |             | 0.531               |                        |              |

|                                                           |            |            |            |            |                   |              |
|-----------------------------------------------------------|------------|------------|------------|------------|-------------------|--------------|
| Formal worker                                             | 23 (26.4%) | 2 (9.5%)   | 5 (33.3%)  | 1 (12.5%)  | Ref               |              |
| Informal worker                                           | 23 (26.4%) | 6 (28.6%)  | 3 (20.0%)  | 1 (12.5%)  | 1.11 (0.38, 3.34) | 0.9          |
| Retired                                                   | 17 (19.5%) | 8 (38.1%)  | 4 (26.7%)  | 2 (25.0%)  | 1.99 (0.72, 5.82) | 0.2          |
| Unemployed                                                | 24 (27.6%) | 5 (23.8%)  | 3 (20.0%)  | 4 (50.0%)  | 1.43 (0.51, 4.23) | 0.5          |
| <b>*Household per capita monthly income</b>               |            |            |            |            | 0.243             |              |
| Less than 249 USD                                         | 75 (85.2%) | 17 (81.0%) | 10 (66.7%) | 5 (71.4%)  | Ref               |              |
| More than 249 USD                                         | 13 (14.8%) | 4 (19.0%)  | 5 (33.3%)  | 2 (28.6%)  | 2.09 (0.86, 4.96) | 0.10         |
| <b>Backyard used for gardening</b>                        |            |            |            |            | <b>0.032</b>      |              |
| No                                                        | 53 (58.2%) | 9 (40.9%)  | 3 (20.0%)  | 4 (50.0%)  | Ref               |              |
| Yes                                                       | 38 (41.8%) | 13 (59.1%) | 12 (80.0%) | 4 (50.0%)  | 2.48 (1.21, 5.21) | <b>0.014</b> |
| <b>Means of waste storage before final disposal</b>       |            |            |            |            | 0.862             |              |
| Open bin                                                  | 21 (23.1%) | 7 (31.8%)  | 4 (26.7%)  | 1 (12.5%)  | Ref               |              |
| Closed bin                                                | 23 (25.3%) | 7 (31.8%)  | 4 (26.7%)  | 2 (25.0%)  | 1.03 (0.40, 2.68) | >0.9         |
| Open sack bag                                             | 16 (17.6%) | 2 (9.1%)   | 4 (26.7%)  | 1 (12.5%)  | 0.88 (0.28, 2.65) | 0.8          |
| Closed sack bag                                           | 31 (34.1%) | 6 (27.3%)  | 3 (20.0%)  | 4 (50.0%)  | 0.82 (0.32, 2.12) | 0.7          |
| <b>*HH waste disposal practices</b>                       |            |            |            |            | 0.095             |              |
| Municipal pickup                                          | 46 (51.1%) | 9 (40.9%)  | 6 (40.0%)  | 4 (50.0%)  | Ref               |              |
| Community central bin                                     | 26 (28.9%) | 11 (50.0%) | 9 (60.0%)  | 4 (50.0%)  | 2.13 (1.02, 4.53) | <b>0.047</b> |
| Others                                                    | 18 (20.0%) | 2 (9.1%)   | 0 (0.0%)   | 0 (0.0%)   | 0.25 (0.04, 0.98) | 0.079        |
| <b>*Waste type most difficult to manage</b>               |            |            |            |            | 0.716             |              |
| Solid                                                     | 27 (34.6%) | 6 (30.0%)  | 7 (50.0%)  | 1 (14.3%)  | Ref               |              |
| Glass                                                     | 12 (15.4%) | 6 (30.0%)  | 3 (21.4%)  | 1 (14.3%)  | 1.41 (0.51, 3.86) | 0.5          |
| Electronic                                                | 12 (15.4%) | 2 (10.0%)  | 1 (7.1%)   | 1 (14.3%)  | 0.66 (0.16, 2.25) | 0.5          |
| Others                                                    | 27 (34.6%) | 6 (30.0%)  | 3 (21.4%)  | 4 (57.1%)  | 0.97 (0.39, 2.42) | >0.9         |
| <b>Perceived helplessness toward mosquito sightings</b>   |            |            |            |            | 0.590             |              |
| No                                                        | 75 (82.4%) | 19 (86.4%) | 14 (93.3%) | 8 (100.0%) | Ref               |              |
| Yes                                                       | 16 (17.6%) | 3 (13.6%)  | 1 (6.7%)   | 0 (0.0%)   | 0.43 (0.12, 1.23) | 0.14         |
| <b>*Prior participation in hygiene awareness programs</b> |            |            |            |            | 0.630             |              |
| No                                                        | 49 (55.1%) | 14 (63.6%) | 10 (66.7%) | 6 (75.0%)  | Ref               |              |
| Yes                                                       | 40 (44.9%) | 8 (36.4%)  | 5 (33.3%)  | 2 (25.0%)  | 0.60 (0.28, 1.24) | 0.2          |
| <b>Backyard hygiene</b>                                   |            |            |            |            | 0.260             |              |

|                                                          |                      |            |             |             |            |              |                   |              |
|----------------------------------------------------------|----------------------|------------|-------------|-------------|------------|--------------|-------------------|--------------|
| <b>conditions</b>                                        |                      |            |             |             |            |              |                   |              |
|                                                          | Clean                | 37 (40.7%) | 10 (45.5%)  | 8 (53.3%)   | 6 (75.0%)  |              | Ref               |              |
|                                                          | Unclean              | 54 (59.3%) | 12 (54.5%)  | 7 (46.7%)   | 2 (25.0%)  | 0.686        | 0.55 (0.27, 1.12) | 0.10         |
| <b>Concern about backyard status</b>                     |                      |            |             |             |            |              |                   |              |
|                                                          | Always               | 71 (78.0%) | 18 (81.8%)  | 14 (93.3%)  | 7 (87.5%)  |              | Ref               |              |
|                                                          | Sometimes            | 20 (22.0%) | 4 (18.2%)   | 1 (6.7%)    | 1 (12.5%)  | <b>0.005</b> | 0.52 (0.18, 1.32) | 0.19         |
| <b>Net installation for mosquito control</b>             |                      |            |             |             |            |              |                   |              |
|                                                          | Yes                  | 54 (59.3%) | 14 (63.6%)  | 6 (40.0%)   | 6 (75.0%)  |              | Ref               |              |
|                                                          | No                   | 37 (40.7%) | 8 (36.4%)   | 9 (60.0%)   | 2 (25.0%)  | 0.721        | 3.69 (1.49, 9.06) | <b>0.004</b> |
| <b>Stagnant water removal for mosquito control</b>       |                      |            |             |             |            |              |                   |              |
|                                                          | Yes                  | 8 (8.8%)   | 6 (27.3%)   | 2 (13.3%)   | 1 (12.5%)  |              | Ref               |              |
|                                                          | No                   | 83 (91.2%) | 16 (72.7%)  | 13 (86.7%)  | 7 (87.5%)  | 0.272        | 1.99 (0.76, 5.02) | 0.15         |
| <b>Perceived body responsible for rat control</b>        |                      |            |             |             |            |              |                   |              |
|                                                          | Individual household | 22 (24.2%) | 3 (13.6%)   | 4 (26.7%)   | 3 (37.5%)  |              | Ref               |              |
|                                                          | The community        | 27 (29.7%) | 10 (45.5%)  | 7 (46.7%)   | 4 (50.0%)  |              | 1.51 (0.61, 3.91) | 0.4          |
|                                                          | The government       | 42 (46.2%) | 9 (40.9%)   | 4 (26.7%)   | 1 (12.5%)  | 0.258        | 0.63 (0.24, 1.66) | 0.3          |
| <b>*Solid waste present in the backyard</b>              |                      |            |             |             |            |              |                   |              |
|                                                          | No                   | 21 (24.1%) | 2 (9.5%)    | 1 (6.7%)    | 2 (25.0%)  |              | Ref               |              |
|                                                          | Yes                  | 66 (75.9%) | 19 (90.5%)  | 14 (93.3%)  | 6 (75.0%)  |              | 2.31 (0.86, 7.33) | 0.12         |
| <b>Health awareness barriers to backyard cleanliness</b> |                      |            |             |             |            |              |                   |              |
|                                                          | No                   | 86 (94.5%) | 22 (100.0%) | 15 (100.0%) | 7 (87.5%)  | 0.4          | Ref               |              |
|                                                          | Yes                  | 5 (5.5%)   | 0 (0.0%)    | 0 (0.0%)    | 1 (12.5%)  |              | 2.43 (0.10, 31.4) | 0.5          |
| <b>Lack of time as a barrier to backyard cleanliness</b> |                      |            |             |             |            |              |                   |              |
|                                                          | No                   | 85 (93.4%) | 17 (77.3%)  | 11 (73.3%)  | 8 (100.0%) | 0.023        | Ref               |              |
|                                                          | Yes                  | 6 (6.6%)   | 5 (22.7%)   | 4 (26.7%)   | 0 (0.0%)   |              | 2.54 (0.95, 6.57) | 0.056        |

12 <sup>1</sup>n (%); Mean (SD)

13 <sup>2</sup>Kruskal-Wallis rank sum test

14 Abbreviations: CI = Confidence Interval, OR = Odds Ratio, HH=Household, HoH=Head of Household

15 \*Variables containing missing data

16

17 **Supplementary Material IVb: Final Model Selection - Mosquito sightings**

|                           | Helpless after mosquito sighting | Neighborhood | Backyard hygiene conditions | Net installation for mosquito control | HH waste disposal practices | household per capita monthly income | Solid waste in backyard | Land surface temperature | Backyard used for gardening | AICc  |
|---------------------------|----------------------------------|--------------|-----------------------------|---------------------------------------|-----------------------------|-------------------------------------|-------------------------|--------------------------|-----------------------------|-------|
| <b>Model 1 (selected)</b> |                                  | +            | +                           | +                                     | +                           |                                     |                         | +                        | +                           | 231   |
| Model 2                   |                                  | +            | +                           | +                                     | +                           |                                     | +                       | +                        | +                           | 231.1 |
| Model 3                   | +                                | +            | +                           | +                                     | +                           |                                     |                         | +                        | +                           | 231.6 |
| Model 4                   | +                                | +            | +                           | +                                     | +                           |                                     | +                       | +                        | +                           | 231.8 |
| Model 5                   | +                                | +            | +                           | +                                     | +                           | +                                   |                         |                          | +                           | 231.8 |

18 HoH - Head of Household; HH - Household
